# Supplementary material for: Transforming growth factor β3 deficiency promotes defective lipid metabolism and fibrosis in murine kidney
Source: PubMed Central journal article supplement (PMC8489029; doi:10.1242/dmm.048249), 2021-10-01
Supplement: dmm-14-048249-s1.pdf [file dmm-14-048249-s1.pdf]

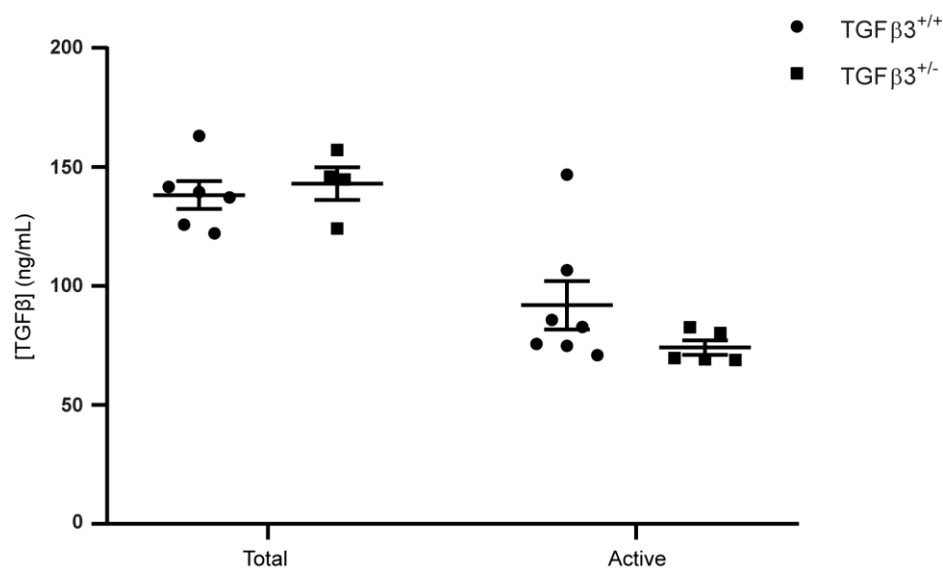

**Fig. S1. Concentration of total and active TGFβ in kidney extracts of *Tgfβ3*<sup>+/-</sup> and *Tgfβ3*<sup>+/+</sup> mice.** Quantitative bioassay for active and total TGFβ based on its ability to induce PAI-1 expression using mink lung epithelial cells (MLEC) stably transfected with a truncated PAI-1 promoter fused to the firefly luciferase reporter gene. Addition of recombinant TGFβ (0.2 to > 2 ng/mL) to the transfectants resulted in a dose-dependent increase in luciferase activity in the whole 4-month-old male kidney lysates (n=5–7). Data are shown as mean ± SEM. A t-test was performed with Welch's correction. \*  $p < 0.05$  versus the control.

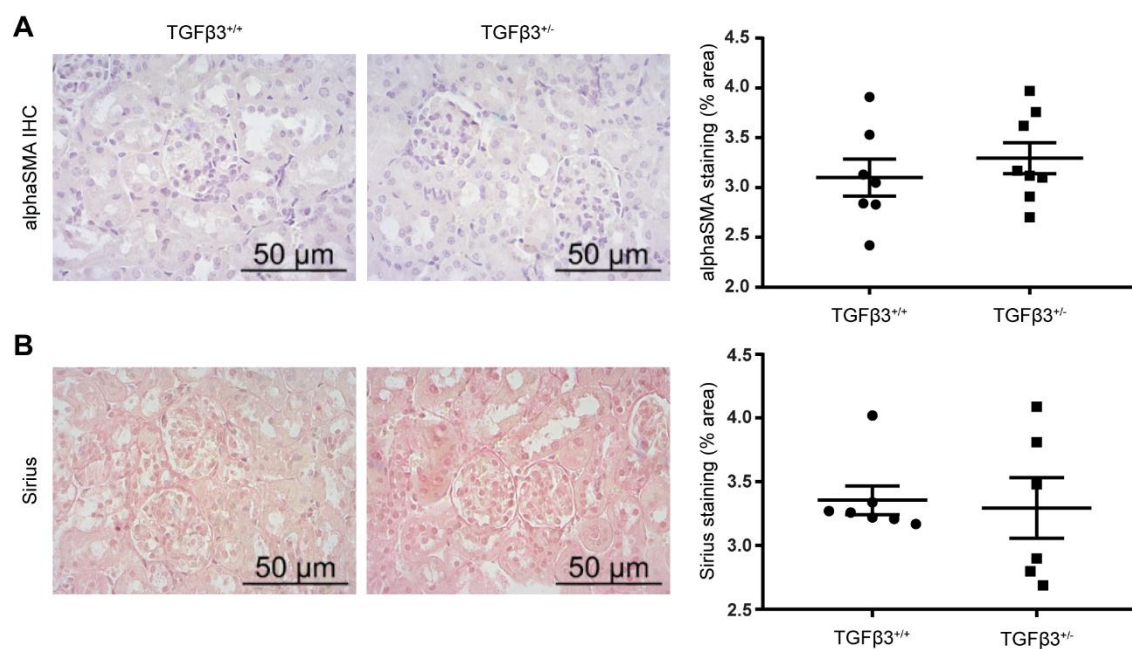

**Fig. S2. Examination of renal fibrosis in female *Tgfβ3*<sup>+/-</sup> and *Tgfβ3*<sup>+/+</sup> mice.** (A) α-SMA immunohistochemistry and (B) Picrosirius staining in kidney from 4-month-old female mice (n=6–8). Images were taken at a magnification of 400×. α-SMA, α smooth muscle actin; IHC, immunohistochemistry. Data are shown as mean ± SEM. A t-test was performed with Welch's correction. \* *p* < 0.05 versus the control.

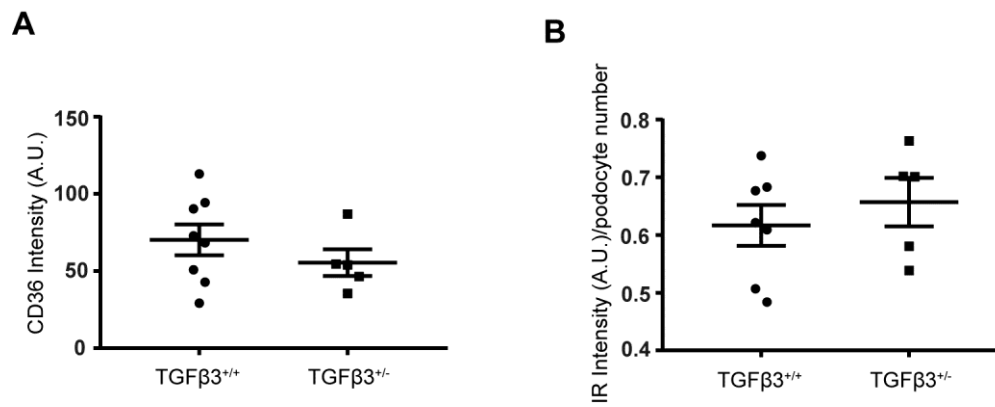

**Fig. S3. Lipid metabolism in  $Tgf\beta 3^{+/+}$  and  $Tgf\beta 3^{-/-}$  kidney.** (A) CD36 staining intensity measured by flow cytometry (n=5–8) in whole kidney of 4-month-old male mice and (B) Insulin receptor (IR) staining measured by flow cytometry in kidney from 4-month-old male mice (n=5–7). Data are shown as mean  $\pm$  SEM. A t-test was performed with Welch's correction. \*  $p < 0.05$  versus the control.

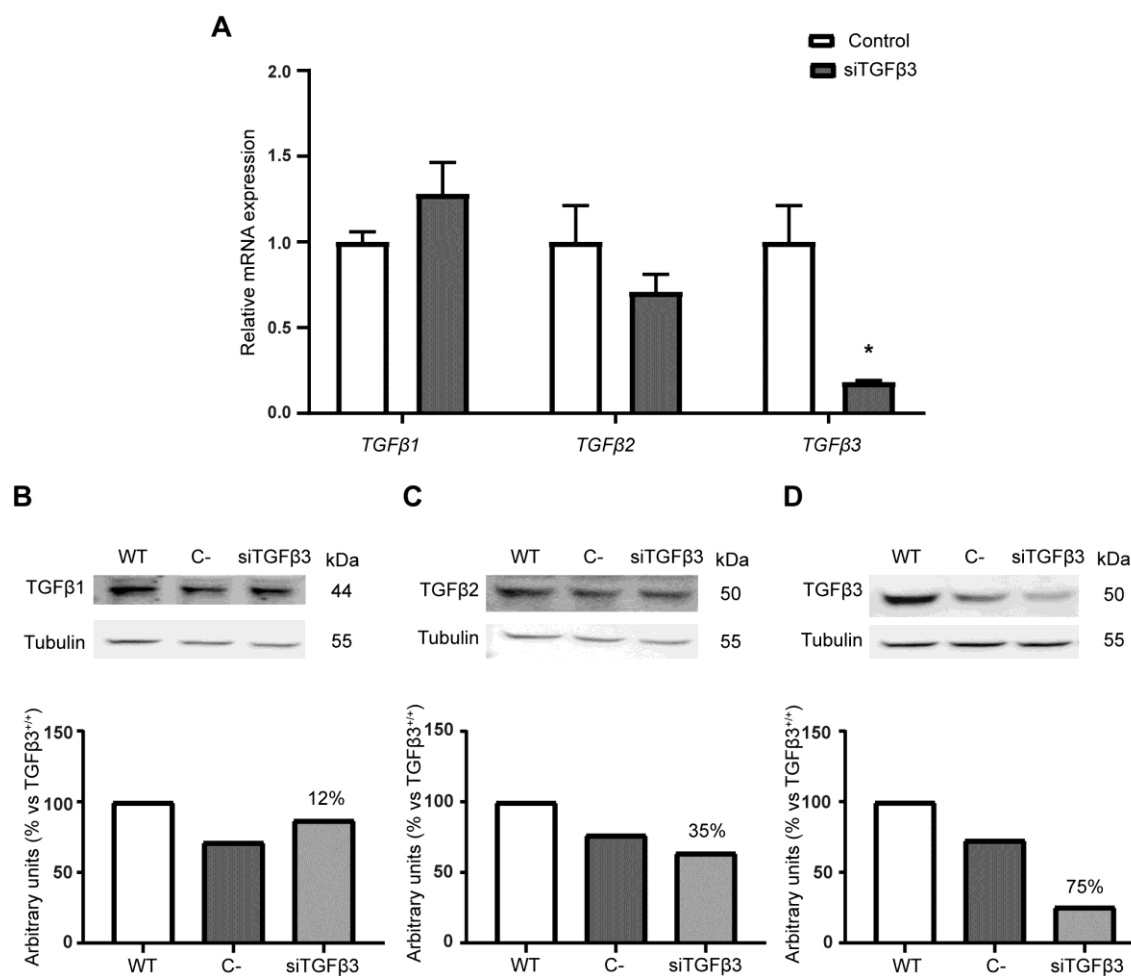

**Fig. S4. TGFβ expression in siTGFβ3 podocytes.** (A) Relative mRNA expression of *Tgfβ1*, *Tgfβ2* and *Tgfβ3* in control and siTGFβ3 podocytes (n=3). (B–D) Western blot quantification of TGFβ1, TGFβ2 and TGFβ3 in control and siTGFβ3 podocytes. Data are shown as mean ± SEM. A t-test was performed with Welch’s correction. \*  $p < 0.05$  versus the control.

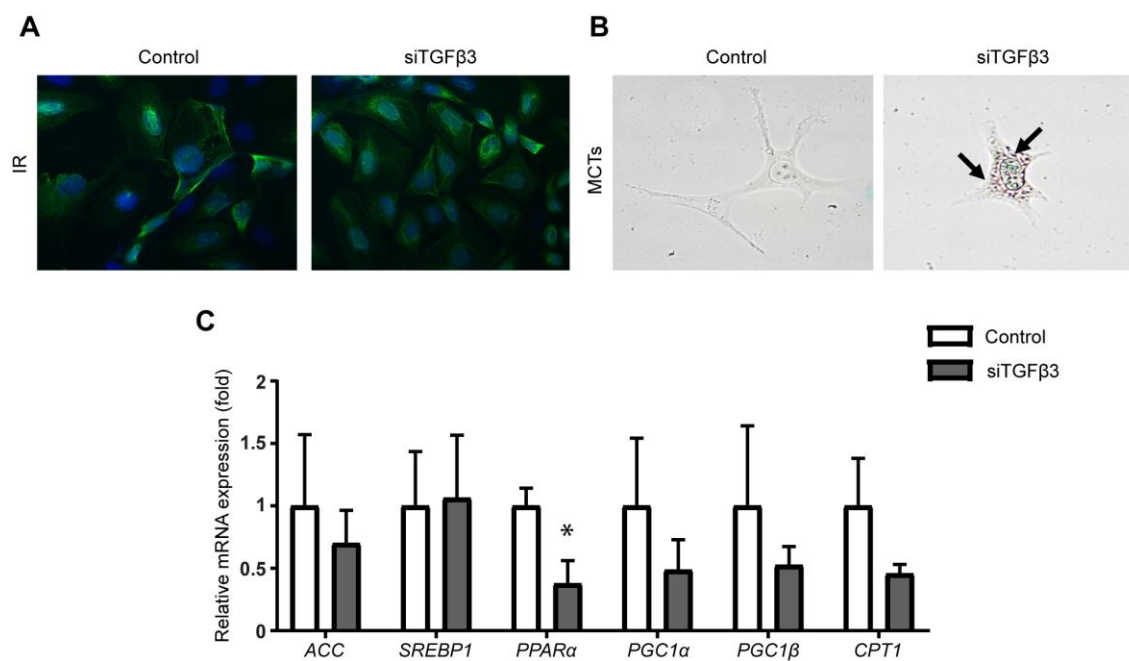

**Fig. S5. *In vitro* experiments in siTGFβ3 podocytes and siTGFβ3 MCTs.** (A) Immunofluorescence for IR in control and siTGFβ3 podocytes (n=3). (B) Oil Red staining (400× magnification) in control and siTGFβ3 mouse proximal tubular epithelial cells (MCTs) (n=3). (C) Relative mRNA expression of lipid metabolism genes in control and siTGFβ3 MCTs (n=3). Images were taken at a magnification of 400×. Black arrows mark red dots representing lipid droplets. Data are shown as mean ± SEM. A t-test was performed with Welch's correction. \*  $p < 0.05$  versus the control.

**Table S1. SYBR Primers**

| Gene             | Forward                    | Reverse                   |
|------------------|----------------------------|---------------------------|
| 36B4             | AGATGCAGCAGATCCGCAT        | GTTCTTGCCCATCAGCACC       |
| ACC              | TGACAGACTGATCGCAGAGAAAG    | TGGAGAGCCCCACACACA        |
| B2M              | ACTGATACATACGCCTGCAGAGTT   | TCACATGTCTCGATCCCAGTAGA   |
| CPT1             | CACGAAGAGCTAAACTTG         | TATGAGAGGGTGCTGCTT        |
| E-cadherin       | CACCTGGAGAGAGGCCATGT       | TGGGAAACATGAGCAGCTCT      |
| Mfn1             | AATTAACCTCCTGCGTTGCTTT     | GATGGAACCCACCAAACCCA      |
| mt12S            | TTGGTAAATTTCTGTCGAGCCACC   | CAGTTTGGGTCTTAGCTGTCGTGT  |
| mtAtp6           | CAGTCCCCTCCCTAGGACTT       | TCAGAGCATTGGCCATAGAA      |
| mtCo1            | CTCGCTAATTTATTCCACTTCA     | GGGGCTAGGGGTAGGGTTAT      |
| mtCo2            | ACCTGGTGAACACTACGACTGCTAGA | TGCTTGATTTAGTCGGCTGGGAT   |
| mtCytB           | ACCAATCTCCCAAACCATCA       | TCCAGAGACTTGGGGATCTAAC    |
| mtND1            | GGGATAACAGCGCAATCCTA       | ATCGTTGAACAAACGAACCA      |
| N-cadherin       | ATGTGCCGATAGCGGGAGC        | TACACCGTGCCGTCCTCGTC      |
| OPA1             | TGCCCTAACCATTTTCAGAGGG     | TCGAGAGCTCCCATCCCTAC      |
| PGC1 $\alpha$    | AACCACACCCACAGGATCA        | CTCTTCGCTTTATTGCTCCATGA   |
| PGC1 $\beta$     | CTGACGTGGACGAGCTTTCA       | CCTTCAGAGCGTCAGAGCTT      |
| PPAR $\alpha$    | CCTCAGGGTACCACTAGGGAGT     | GCCCGAATAGTTCGCCGAAA      |
| SREBP1           | GCCATGGATTGCACATTTGA       | GGCCCGGAAGTCACTG          |
| SMAD7            | AAGTGTTTCAGGTGGCCGATCTCAG  | ACAGCATCTGGACAGCCTGCAGTTG |
| TFAM             | CAGGAGGCAAAGGATGATTC       | CCAAGACTTCATTTATTGTCG     |
| TGF $\beta$ 1    | GGATACCAACTATTGCTTCAG      | TGTCCAGGCTCCAAATATAG      |
| TGF $\beta$ 2    | GAGATTTGCAGGTATTGATGG      | CAACAACATTAGCAGGAGATG     |
| TGF $\beta$ 3    | GGTTACTATGCCAACTTCTG       | CACATAGTACAAGATGGTCAG     |
| $\beta$ -catenin | ACTGCTGGGACTCTG            | TGATGGCGTAGAACAG          |
| TIR              | CCTGAAGTTCTAGATGATT        | CTTCATGGATTCCACCAAT       |
| TIIR             | CCAGGATGAATGTGGAAAAC       | TAATCCTTCACTTCTCCCAC      |
| <b>gDNA</b>      |                            |                           |
| g16S             | CCGCAAGGGAAAGATGAAAGAC     | TCGTTTGGTTTCGGGGTTTC      |
| gHK2             | GCCAGCCTCTCCTGATTTTAGTGT   | GGGAACACAAAAGACCTCTTCTGG  |
| gND1             | CTAGCAGAAACAAACCGGGC       | CCGGCTGCGTATTCTACGTT      |

**Table S2. TaqMan Primers**

| Gene           | Forward               | Reverse                   | Probe                       |
|----------------|-----------------------|---------------------------|-----------------------------|
| 18S            | CGGCTACCACATCCAAGGAA  | GTCGGAATTACCGCGGCT        | GAG GGC AAG TCT GGT GCC AG  |
| F4/80          | CAGATACAGCAATGCCAAGCA | GATTGTGAAGGTAGCATTACAAGTG | TGCAGGGCAGGGATCTTGGTTATGC   |
| $\beta$ -actin | GCTCTGGCTCCTAGACCCAT  | GCCACCGATCCACACAGAGT      | ATCAAGATCATTGCTCCTCCTGAGCGC |

**Table S3. Antibodies**

| Gene            | Manufacturer   | Reference | Dilution |
|-----------------|----------------|-----------|----------|
| TGFβ1           | Abcam          | ab92486   | 1:400    |
| TGFβ2           | Abcam          | ab36495   | 1:1000   |
| TGFβ3           | Abcam          | ab15537   | 1:200    |
| Phospho-JNK     | Cell Signaling | 9251      | 1:500    |
| Total JNK       | Cell Signaling | 9258      | 1:1000   |
| Phospho-ERK1/2  | Cell Signaling | 9106      | 1:1000   |
| Total ERK 1/2   | Cell Signaling | 4695      | 1:1000   |
| Phospho-SMAD2/3 | Cell Signaling | 8828      | 1:500    |
| Total SMAD2/3   | Cell Signaling | 3102      | 1:1000   |
| Phospho-AKT     | Cell Signaling | 4051      | 1:1000   |
| Total AKT       | Santa Cruz     | sc8312    | 1:1000   |
| Tubulin         | Sigma-Aldrich  | T5168     | 1;5000   |
| Podocin         | Abcam          | ab65291   | 1;60     |
| Nitrotyrosine   | Millipore      | 06-284    | 1:100    |
| α-SMA           | Dako           | M0851     | 1:100    |
| CD36            | Santa Cruz     | sc7309    | 1:50     |
| IRα             | Biorbyt        | 650068    | 1:50     |

**Table S4. General and metabolic parameters of female *Tgfb3*<sup>+/+</sup> and *Tgfb3*<sup>+/-</sup> mice at 1 and 4 months of age**

|                          | Units           | 1 month                     |                             | 4 months                    |                             |
|--------------------------|-----------------|-----------------------------|-----------------------------|-----------------------------|-----------------------------|
|                          |                 | <i>Tgfb3</i> <sup>+/+</sup> | <i>Tgfb3</i> <sup>+/-</sup> | <i>Tgfb3</i> <sup>+/+</sup> | <i>Tgfb3</i> <sup>+/-</sup> |
| <b>Total body weight</b> | g               | 12.63±0.32                  | 12.43±0.33                  | 20.87±0.60                  | 20.78±0.49                  |
| <b>Glucose</b>           | mg/dL           | 10.38±0.54                  | 11±0.28                     | 10.9±1.21                   | 10.35±0.96                  |
| <b>Triglycerides</b>     | md/dL           | 161.2±9.67                  | 150.34±22.70                | 198.14±11.25                | 176.08±16.93                |
| <b>Total Cholesterol</b> | mg/dL           | 108.34±3.25                 | 93.03±10.47                 | 102.77±6.68                 | 109.48±13.06                |
| <b>LDL</b>               | mmol/L          | 0.71±0.05                   | 0.66±0.05                   | 0.78±0.21                   | 0.52±0.07                   |
| <b>HDL</b>               | mmol/L          | 1.80±0.06                   | 1.48±0.19                   | 1.31±0.34                   | 0.93±0.49                   |
| <b>Total Proteins</b>    | g/dL            | 6.23±0.14                   | 5.95±0.33                   | 6.53±0.19                   | 6.88±0.39                   |
| <b>NEFAs</b>             | mmol/L          | 3.32±0.19                   | 3.08±0.21                   | 4.47±0.37                   | 3.15±0.77                   |
| <b>Kidney weight</b>     | g               | 0.06±0.003                  | 0.06±0.009                  | 0.097±0.004                 | 0.11±0.003                  |
| <b>Glomeruli size</b>    | µm <sup>2</sup> | 21550.38±2417.72            | 24545.9±5643.95             | 32671.98±7194.8             | 34103.97±3872.01            |
| <b>Serum Albumin</b>     | g/L             | 4.32±0.24                   | 4.23±0.25                   | 4.24±0.18                   | 4.54±0.22                   |
| <b>ACR</b>               | mg/mmol         | 5.05±1.09                   | 5.93±0.71                   | 24.75±5.23                  | 17.003±1.08                 |

Notes: LDL, low-density lipoprotein; HDL, high-density lipoprotein; NEFAs, non-esterified fatty acids; ACR; albumin-creatinine ratio. n=7–12 animals per group.
